# Supplementary material for: Sero-Epidemiological Study of Bordetella pertussis Infection in the Italian General Population
Source: MDPI journal article supplement (doi:10.3390/vaccines10122130), 2022-12-13
Supplement: s1 [file s1]

### Sero-epidemiological Study Group

Bordino V <sup>1</sup>, Cornio A <sup>1</sup>, Greco F <sup>2</sup>, Giandomenico A <sup>2</sup>, Montomoli E <sup>3</sup>, Trombetta CM <sup>3</sup>, Baldo V <sup>4</sup>, Baldovin T <sup>4</sup>, De Fino M <sup>5</sup>, Marandola M <sup>6</sup>, Orsi A <sup>7</sup>, Ricucci V <sup>8</sup>, Barrocci S <sup>9</sup>, La Porta R <sup>9</sup>, Raspa P <sup>10</sup>, Castiglia P <sup>11</sup>, Dettori M <sup>11</sup>, Ghisellini S <sup>12</sup>, Boni M <sup>12</sup>, Tramuto F <sup>13</sup>, Robatscher E <sup>14</sup>, Gamper A <sup>14</sup>, Panico A <sup>15</sup>, Angelillo IF <sup>16</sup>, Napolitano F <sup>16</sup>, De Motoli F <sup>17</sup>, Flacco ME <sup>18</sup>

<sup>1</sup> Dept. of Sciences of Public Health and Pediatrics, University of Turin, Italy; <sup>2</sup> Unit of Microbiology and Virology, “Annunziata” Hospital, Cosenza, Italy; <sup>3</sup> Dept. of Molecular and Developmental Medicine, University of Siena, Italy; <sup>4</sup> Dept. of Cardiac, Thoracic, Vascular Sciences and Public Health, Unit of Hygiene and Public Health, University of Padova, Italy; <sup>5</sup> General Manager of Umbria2 LHA, Terni, Italy, former Manager of Healthcare District of Lauria, Potenza, Italy; <sup>6</sup> Unit of Hygiene and Public Health, Potenza LHA, Italy; <sup>7</sup> Dept. of Health Sciences, University of Genova, Italy; <sup>8</sup> Unit of Hygiene, IRCCS San Martino Hospital, Genova, Italy; <sup>9</sup> Unit of Clinical Pathology, Area Vasta 1, Clinical Laboratory of “S. Maria della Misericordia” Hospital, Urbino, Italy; <sup>10</sup> Clinical Laboratory, Ozieri, ATS Sardegna, Sassari LHA, Italy; <sup>11</sup> Department of Medicine, Surgery and Pharmacy, University of Sassari, Italy; <sup>12</sup> UOC Provincial Laboratory, University Hospital of Ferrara, Italy; <sup>13</sup> Dept. PROMISE, University of Palermo; <sup>14</sup> Microbiology and Virology Laboratory, Health District of Bolzano, Alto Adige Health Authority, Italy; <sup>15</sup> Dept. of Biological and Environmental Sciences and Technologies, University of Salento, Lecce; <sup>16</sup> Dept. of Experimental Medicine, University of Campania “Luigi Vanvitelli”, Naples, Italy; <sup>17</sup> Post-graduate School of Hygiene and Preventive Medicine, University of Ferrara, Ferrara, Italy; <sup>18</sup> Dept. of Environment and Prevention Sciences, University of Ferrara, Ferrara, Italy
